# Supplementary material
Source: MDPI journal article supplement (https://www.mdpi.com/2673-6918/4/2/18)

## checkCIF/PLATON report

Structure factors have been supplied for datablock(s) BM1155s\_100

THIS REPORT IS FOR GUIDANCE ONLY. IF USED AS PART OF A REVIEW PROCEDURE FOR PUBLICATION, IT SHOULD NOT REPLACE THE EXPERTISE OF AN EXPERIENCED CRYSTALLOGRAPHIC REFEREE.

No syntax errors found.      CIF dictionary      Interpreting this report

### Datablock: BM1155s\_100

---

Bond precision:      C-C = 0.0162 Å      Wavelength=0.71070

Cell:                      a=12.5669(4)                      b=15.5598(5)                      c=22.2169(4)  
                              alpha=92.465(2)                      beta=96.440(2)                      gamma=102.188(2)  
Temperature:              100 K

|                        | Calculated                                                                                                         | Reported                                                         |
|------------------------|--------------------------------------------------------------------------------------------------------------------|------------------------------------------------------------------|
| Volume                 | 4209.6(2)                                                                                                          | 4209.6(2)                                                        |
| Space group            | P -1                                                                                                               | P -1                                                             |
| Hall group             | -P 1                                                                                                               | -P 1                                                             |
| Moiety formula         | C <sub>48</sub> H <sub>90</sub> Hf <sub>6</sub> O <sub>33</sub> , 3(C <sub>4</sub> H <sub>8</sub> O <sub>2</sub> ) | ?                                                                |
| Sum formula            | C <sub>60</sub> H <sub>114</sub> Hf <sub>6</sub> O <sub>39</sub>                                                   | C <sub>60</sub> H <sub>114</sub> Hf <sub>6</sub> O <sub>39</sub> |
| Mr                     | 2530.46                                                                                                            | 2530.45                                                          |
| Dx, g cm <sup>-3</sup> | 1.996                                                                                                              | 1.996                                                            |
| Z                      | 2                                                                                                                  | 2                                                                |
| Mu (mm <sup>-1</sup> ) | 7.451                                                                                                              | 7.451                                                            |
| F000                   | 2436.0                                                                                                             | 2436.0                                                           |
| F000'                  | 2430.71                                                                                                            |                                                                  |
| h, k, lmax             |                                                                                                                    | 15, 19, 27                                                       |
| Nref                   |                                                                                                                    | 17520                                                            |
| Tmin, Tmax             | 0.272, 0.475                                                                                                       | 0.340, 1.000                                                     |
| Tmin'                  | 0.217                                                                                                              |                                                                  |

Correction method= # Reported T Limits: Tmin=0.340 Tmax=1.000  
AbsCorr = MULTI-SCAN

Data completeness=                      Theta(max)= 26.569

|                                |                                  |
|--------------------------------|----------------------------------|
| R(reflections)= 0.0501( 12636) | wR2(reflections)= 0.1302( 17520) |
| S = 1.033                      | Npar= 964                        |

---

The following ALERTS were generated. Each ALERT has the format

**test-name\_ALERT\_alert-type\_alert-level.**

Click on the hyperlinks for more details of the test.

---

### Alert level A

|                   |                                        |     |           |
|-------------------|----------------------------------------|-----|-----------|
| PLAT973_ALERT_2_A | Check Calcd Positive Resid. Density on | Hf6 | 2.71 eA-3 |
| PLAT973_ALERT_2_A | Check Calcd Positive Resid. Density on | Hf3 | 2.34 eA-3 |
| PLAT973_ALERT_2_A | Check Calcd Positive Resid. Density on | Hf2 | 2.31 eA-3 |

---

### Alert level B

|                   |                                                  |         |      |
|-------------------|--------------------------------------------------|---------|------|
| PLAT910_ALERT_3_B | Missing # of FCF Reflection(s) Below Theta(Min). | 24      | Note |
|                   | 1 0 0, -1 1 0, 0 1 0, 1 1 0, 0 2 0,              | 0 -2 1, |      |
|                   | -1 -1 1, 0 -1 1, 1 -1 1, -1 0 1, 0 0 1,          | 1 0 1,  |      |
|                   | -1 1 1, 0 1 1, 1 1 1, -1 -1 2, 0 -1 2,           | 1 -1 2, |      |
|                   | -1 0 2, 0 0 2, 1 0 2, -1 1 2, 0 1 2,             | 0 0 3,  |      |
| PLAT971_ALERT_2_B | Check Calcd Resid. Dens. 1.10Ang From Hf6        | 3.36    | eA-3 |
| PLAT971_ALERT_2_B | Check Calcd Resid. Dens. 1.15Ang From O27        | 3.34    | eA-3 |
| PLAT971_ALERT_2_B | Check Calcd Resid. Dens. 0.86Ang From Hf1        | 3.26    | eA-3 |
| PLAT971_ALERT_2_B | Check Calcd Resid. Dens. 2.46Ang From C1         | 3.04    | eA-3 |
| PLAT971_ALERT_2_B | Check Calcd Resid. Dens. 1.76Ang From O4         | 3.03    | eA-3 |
| PLAT971_ALERT_2_B | Check Calcd Resid. Dens. 0.88Ang From Hf6        | 2.79    | eA-3 |
| PLAT971_ALERT_2_B | Check Calcd Resid. Dens. 0.91Ang From Hf2        | 2.77    | eA-3 |
| PLAT971_ALERT_2_B | Check Calcd Resid. Dens. 0.94Ang From Hf2        | 2.77    | eA-3 |
| PLAT971_ALERT_2_B | Check Calcd Resid. Dens. 2.47Ang From C5         | 2.69    | eA-3 |
| PLAT971_ALERT_2_B | Check Calcd Resid. Dens. 0.91Ang From Hf4        | 2.67    | eA-3 |
| PLAT971_ALERT_2_B | Check Calcd Resid. Dens. 0.89Ang From Hf5        | 2.67    | eA-3 |
| PLAT971_ALERT_2_B | Check Calcd Resid. Dens. 0.86Ang From Hf3        | 2.54    | eA-3 |
| PLAT971_ALERT_2_B | Check Calcd Resid. Dens. 0.95Ang From Hf5        | 2.53    | eA-3 |
| PLAT971_ALERT_2_B | Check Calcd Resid. Dens. 2.24Ang From C16        | 2.52    | eA-3 |
| PLAT972_ALERT_2_B | Check Calcd Resid. Dens. 0.87Ang From Hf5        | -3.48   | eA-3 |
| PLAT972_ALERT_2_B | Check Calcd Resid. Dens. 0.78Ang From Hf4        | -3.38   | eA-3 |
| PLAT972_ALERT_2_B | Check Calcd Resid. Dens. 0.84Ang From Hf6        | -3.13   | eA-3 |
| PLAT972_ALERT_2_B | Check Calcd Resid. Dens. 0.92Ang From Hf1        | -2.86   | eA-3 |
| PLAT972_ALERT_2_B | Check Calcd Resid. Dens. 1.02Ang From O7         | -2.75   | eA-3 |
| PLAT972_ALERT_2_B | Check Calcd Resid. Dens. 0.78Ang From Hf2        | -2.72   | eA-3 |
| PLAT972_ALERT_2_B | Check Calcd Resid. Dens. 0.79Ang From Hf2        | -2.52   | eA-3 |

---

### Alert level C

|                   |                                                           |         |        |
|-------------------|-----------------------------------------------------------|---------|--------|
| PLAT220_ALERT_2_C | NonSolvent Resd 1 C Ueq(max)/Ueq(min) Range               | 6.0     | Ratio  |
| PLAT222_ALERT_3_C | NonSolvent Resd 1 H Uiso(max)/Uiso(min) Range             | 9.6     | Ratio  |
| PLAT234_ALERT_4_C | Large Hirshfeld Difference C2 --C4                        | 0.17    | Ang.   |
| PLAT242_ALERT_2_C | Low 'MainMol' Ueq as Compared to Neighbors of             | C2      | Check  |
| PLAT250_ALERT_2_C | Large U3/U1 Ratio for Average U(i,j) Tensor ....          | 2.2     | Note   |
| PLAT250_ALERT_2_C | Large U3/U1 Ratio for Average U(i,j) Tensor ....          | 2.2     | Note   |
| PLAT250_ALERT_2_C | Large U3/U1 Ratio for Average U(i,j) Tensor ....          | 3.1     | Note   |
| PLAT342_ALERT_3_C | Low Bond Precision on C-C Bonds .....                     | 0.01622 | Ang.   |
| PLAT601_ALERT_2_C | Unit Cell Contains Solvent Accessible VOIDS of .          | 34      | Ang**3 |
| PLAT906_ALERT_3_C | Large K Value in the Analysis of Variance .....           | 3.481   | Check  |
| PLAT911_ALERT_3_C | Missing FCF Refl Between Thmin & STh/L= 0.600             | 22      | Report |
|                   | -5 -4 10, 3-13 13, 3-12 13, 3-11 13, 3-13 14, 3-12 14,    |         |        |
|                   | -5-11 14, 3-13 15, 3-14 16, -10 4 19, -11 4 20, -10 4 21, |         |        |
|                   | -10 5 21, -5 4 23, -6 5 23, -7 6 23, -5 3 24, -7 4 24,    |         |        |

|                                                                    |            |
|--------------------------------------------------------------------|------------|
| -6 4 24, -7 5 24, -5 4 25, -3 5 25,                                |            |
| PLAT913_ALERT_3_C Missing # of Very Strong Reflections in FCF .... | 5 Note     |
| -1 1 0, 0 -1 1, -1 0 1, 0 1 1, 0 0 2,                              |            |
| PLAT971_ALERT_2_C Check Calcd Resid. Dens. 2.45Ang From O2         | 2.50 eA-3  |
| PLAT971_ALERT_2_C Check Calcd Resid. Dens. 0.88Ang From Hf6        | 2.48 eA-3  |
| PLAT971_ALERT_2_C Check Calcd Resid. Dens. 1.06Ang From Hf4        | 2.38 eA-3  |
| PLAT971_ALERT_2_C Check Calcd Resid. Dens. 0.84Ang From Hf2        | 2.34 eA-3  |
| PLAT971_ALERT_2_C Check Calcd Resid. Dens. 1.03Ang From Hf5        | 2.33 eA-3  |
| PLAT971_ALERT_2_C Check Calcd Resid. Dens. 0.89Ang From Hf2        | 2.29 eA-3  |
| PLAT971_ALERT_2_C Check Calcd Resid. Dens. 0.88Ang From Hf4        | 2.29 eA-3  |
| PLAT971_ALERT_2_C Check Calcd Resid. Dens. 0.93Ang From Hf3        | 2.26 eA-3  |
| PLAT972_ALERT_2_C Check Calcd Resid. Dens. 0.96Ang From Hf3        | -2.49 eA-3 |
| PLAT972_ALERT_2_C Check Calcd Resid. Dens. 0.93Ang From Hf4        | -2.49 eA-3 |
| PLAT972_ALERT_2_C Check Calcd Resid. Dens. 1.15Ang From C25        | -2.44 eA-3 |
| PLAT972_ALERT_2_C Check Calcd Resid. Dens. 0.74Ang From Hf3        | -2.38 eA-3 |
| PLAT972_ALERT_2_C Check Calcd Resid. Dens. 0.89Ang From O19        | -2.36 eA-3 |
| PLAT972_ALERT_2_C Check Calcd Resid. Dens. 0.70Ang From O37        | -2.36 eA-3 |
| PLAT972_ALERT_2_C Check Calcd Resid. Dens. 1.14Ang From O2         | -2.28 eA-3 |
| PLAT972_ALERT_2_C Check Calcd Resid. Dens. 0.59Ang From Hf3        | -2.26 eA-3 |
| PLAT972_ALERT_2_C Check Calcd Resid. Dens. 0.86Ang From Hf5        | -2.18 eA-3 |
| PLAT972_ALERT_2_C Check Calcd Resid. Dens. 0.90Ang From Hf1        | -2.16 eA-3 |
| PLAT972_ALERT_2_C Check Calcd Resid. Dens. 0.93Ang From Hf6        | -2.10 eA-3 |
| PLAT972_ALERT_2_C Check Calcd Resid. Dens. 1.20Ang From O7         | -2.08 eA-3 |
| PLAT972_ALERT_2_C Check Calcd Resid. Dens. 1.47Ang From C23        | -2.07 eA-3 |
| PLAT972_ALERT_2_C Check Calcd Resid. Dens. 1.22Ang From O3         | -2.02 eA-3 |
| PLAT972_ALERT_2_C Check Calcd Resid. Dens. 1.68Ang From O20        | -1.98 eA-3 |
| PLAT972_ALERT_2_C Check Calcd Resid. Dens. 0.72Ang From Hf5        | -1.97 eA-3 |
| PLAT972_ALERT_2_C Check Calcd Resid. Dens. 1.23Ang From Hf4        | -1.81 eA-3 |
| PLAT972_ALERT_2_C Check Calcd Resid. Dens. 1.25Ang From Hf3        | -1.75 eA-3 |
| PLAT977_ALERT_2_C Check Negative Difference Density on H3C .       | -0.31 eA-3 |
| PLAT977_ALERT_2_C Check Negative Difference Density on H4B .       | -0.75 eA-3 |
| PLAT977_ALERT_2_C Check Negative Difference Density on H11C .      | -0.36 eA-3 |
| PLAT977_ALERT_2_C Check Negative Difference Density on H16C .      | -0.44 eA-3 |
| PLAT977_ALERT_2_C Check Negative Difference Density on H32 .       | -0.60 eA-3 |
| PLAT977_ALERT_2_C Check Negative Difference Density on H38D .      | -0.39 eA-3 |
| PLAT977_ALERT_2_C Check Negative Difference Density on H51A .      | -0.44 eA-3 |
| PLAT977_ALERT_2_C Check Negative Difference Density on H57A .      | -0.40 eA-3 |

## ● Alert level G

|                                                                    |              |
|--------------------------------------------------------------------|--------------|
| PLAT002_ALERT_2_G Number of Distance or Angle Restraints on AtSite | 14 Note      |
| PLAT003_ALERT_2_G Number of Uiso or Uij Restrained non-H Atoms ... | 8 Report     |
| PLAT007_ALERT_5_G Number of Unrefined Donor-H Atoms .....          | 4 Report     |
| H28 H31 H32 H33                                                    |              |
| PLAT083_ALERT_2_G SHELXL Second Parameter in WGHT Unusually Large  | 43.91 Why ?  |
| PLAT154_ALERT_1_G The s.u.'s on the Cell Angles are Equal ..(Note) | 0.002 Degree |
| PLAT172_ALERT_4_G The CIF-Embedded .res File Contains DFIX Records | 7 Report     |
| PLAT186_ALERT_4_G The CIF-Embedded .res File Contains ISOR Records | 2 Report     |
| PLAT300_ALERT_4_G Atom Site Occupancy of H32 Constrained at        | 0.9 Check    |
| PLAT300_ALERT_4_G Atom Site Occupancy of H33 Constrained at        | 0.1 Check    |
| PLAT303_ALERT_2_G Full Occupancy Atom H2 with # Connections        | 2.00 Check   |
| PLAT309_ALERT_2_G Single Bonded Oxygen (C-O > 1.3 Ang) .....       | 033 Check    |
| PLAT764_ALERT_4_G Overcomplete CIF Bond List Detected (Rep/Expd) . | 1.11 Ratio   |
| PLAT790_ALERT_4_G Centre of Gravity not Within Unit Cell: Resd. #  | 2 Note       |
| C4 H8 O2                                                           |              |
| PLAT790_ALERT_4_G Centre of Gravity not Within Unit Cell: Resd. #  | 4 Note       |
| C4 H8 O2                                                           |              |

|                   |                                                  |      |   |      |              |
|-------------------|--------------------------------------------------|------|---|------|--------------|
| PLAT794_ALERT_5_G | Tentative Bond Valency for Hf1                   | (IV) | . | 4.03 | Info         |
| PLAT794_ALERT_5_G | Tentative Bond Valency for Hf2                   | (IV) | . | 4.07 | Info         |
| PLAT794_ALERT_5_G | Tentative Bond Valency for Hf3                   | (IV) | . | 4.04 | Info         |
| PLAT794_ALERT_5_G | Tentative Bond Valency for Hf5                   | (IV) | . | 4.05 | Info         |
| PLAT794_ALERT_5_G | Tentative Bond Valency for Hf6                   | (IV) | . | 4.00 | Info         |
| PLAT860_ALERT_3_G | Number of Least-Squares Restraints .....         |      |   | 58   | Note         |
| PLAT883_ALERT_1_G | No Info/Value for _atom_sites_solution_primary . |      |   |      | Please Do !  |
| PLAT912_ALERT_4_G | Missing # of FCF Reflections Above STh/L= 0.600  |      |   | 23   | Note         |
| PLAT941_ALERT_3_G | Average HKL Measurement Multiplicity .....       |      |   | 2.2  | Low          |
| PLAT965_ALERT_2_G | The SHELXL WEIGHT Optimisation has not Converged |      |   |      | Please Check |
| PLAT967_ALERT_5_G | Note: Two-Theta Cutoff Value in Embedded .res .. |      |   | 53.1 | Degree       |
| PLAT978_ALERT_2_G | Number C-C Bonds with Positive Residual Density. |      |   | 0    | Info         |

---

3 **ALERT level A** = Most likely a serious problem - resolve or explain  
22 **ALERT level B** = A potentially serious problem, consider carefully  
46 **ALERT level C** = Check. Ensure it is not caused by an omission or oversight  
26 **ALERT level G** = General information/check it is not something unexpected

2 ALERT type 1 CIF construction/syntax error, inconsistent or missing data  
71 ALERT type 2 Indicator that the structure model may be wrong or deficient  
8 ALERT type 3 Indicator that the structure quality may be low  
9 ALERT type 4 Improvement, methodology, query or suggestion  
7 ALERT type 5 Informative message, check

---

It is advisable to attempt to resolve as many as possible of the alerts in all categories. Often the minor alerts point to easily fixed oversights, errors and omissions in your CIF or refinement strategy, so attention to these fine details can be worthwhile. In order to resolve some of the more serious problems it may be necessary to carry out additional measurements or structure refinements. However, the purpose of your study may justify the reported deviations and the more serious of these should normally be commented upon in the discussion or experimental section of a paper or in the "special\_details" fields of the CIF. checkCIF was carefully designed to identify outliers and unusual parameters, but every test has its limitations and alerts that are not important in a particular case may appear. Conversely, the absence of alerts does not guarantee there are no aspects of the results needing attention. It is up to the individual to critically assess their own results and, if necessary, seek expert advice.

### Publication of your CIF in IUCr journals

A basic structural check has been run on your CIF. These basic checks will be run on all CIFs submitted for publication in IUCr journals (*Acta Crystallographica*, *Journal of Applied Crystallography*, *Journal of Synchrotron Radiation*); however, if you intend to submit to *Acta Crystallographica Section C* or *E* or *IUCrData*, you should make sure that full publication checks are run on the final version of your CIF prior to submission.

### Publication of your CIF in other journals

Please refer to the *Notes for Authors* of the relevant journal for any special instructions relating to CIF submission.

PLATON version of 14/11/2023; check.def file version of 14/09/2023

Datablock BM1155s\_100 - ellipsoid plot

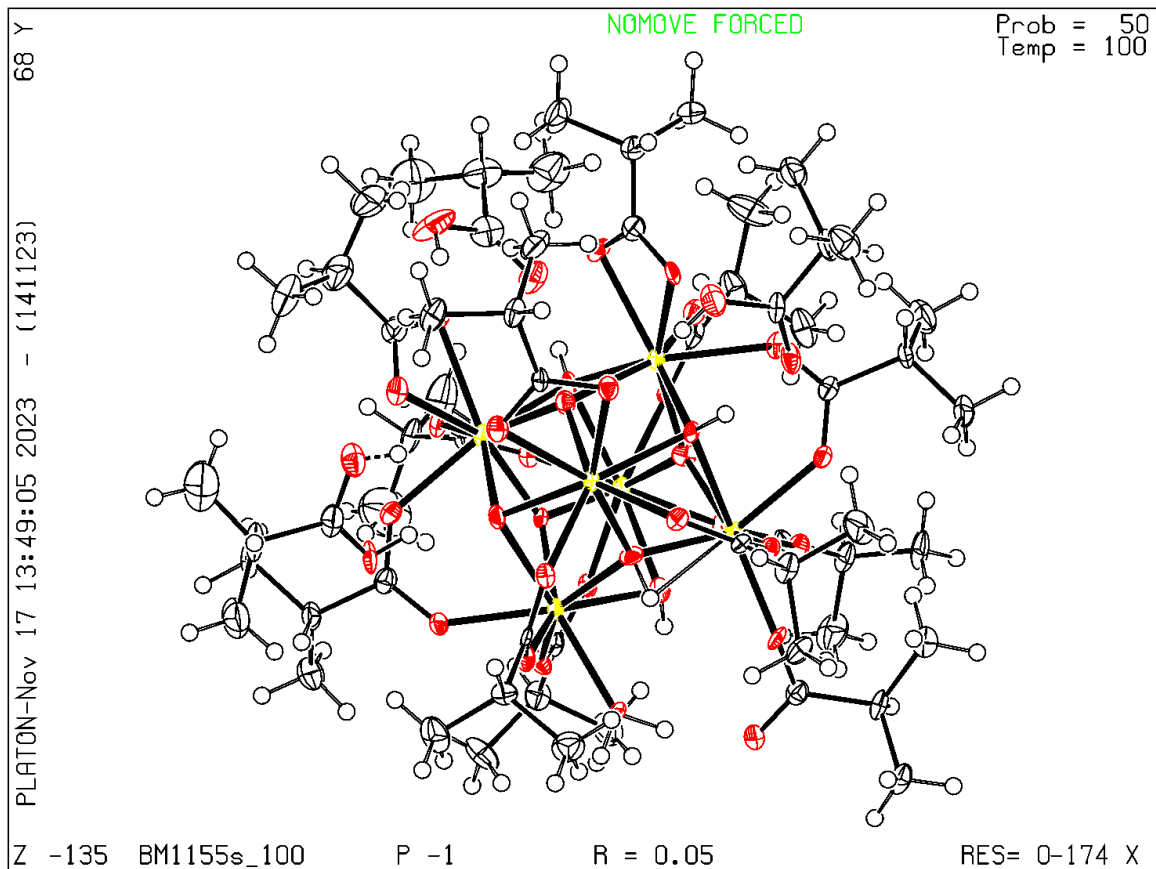

Supplement: s1 [file s1]
