# Supplementary material
Source: MDPI journal article supplement (https://www.mdpi.com/2673-6918/4/2/18)
Supplement: s1 [file s1]

## Supplementary materials

# New Data on the Reactions of Zirconium and Hafnium Tetrachlorides with Aliphatic Acids

Victor D. Makhaev \*, Larisa A. Petrova, Gennadii V. Shilov, and Sergey M. Aldoshin

Federal Research Center of Problems of Chemical Physics and Medicinal Chemistry, Russian Academy of Sciences, Chernogolovka 142432, Russia; lapetrova@yahoo.com (L.A.P.); genshil@icp.ac.ru (G.V.S.); aldoshin@icp.ac.ru (S.M.A.)

\* Correspondence: vim@icp.ac.ru

**Table S1.** Bond lengths [Å] for complex IV.

| Complex IV  | Bond Lengths [Å] |
|-------------|------------------|
| Hf(1)-O(6)  | 2.039(6)         |
| Hf(1)-O(3)  | 2.096(7)         |
| Hf(1)-O(1)  | 2.189(6)         |
| Hf(1)-O(7)  | 2.191(6)         |
| Hf(1)-O(10) | 2.205(7)         |
| Hf(1)-O(35) | 2.207(6)         |
| Hf(1)-O(14) | 2.270(6)         |
| Hf(1)-O(13) | 2.276(7)         |
| Hf(1)-C(9)  | 2.654(10)        |
| Hf(1)-Hf(5) | 3.4646(5)        |
| Hf(1)-Hf(2) | 3.4713(5)        |
| Hf(1)-Hf(6) | 3.4971(5)        |
| Hf(2)-O(6)  | 2.030(6)         |
| Hf(2)-O(2)  | 2.055(7)         |
| Hf(2)-O(34) | 2.166(7)         |
| Hf(2)-O(18) | 2.180(6)         |
| Hf(2)-O(38) | 2.217(6)         |
| Hf(2)-O(24) | 2.224(6)         |
| Hf(2)-O(4)  | 2.253(6)         |
| Hf(2)-O(1)  | 2.372(6)         |
| Hf(2)-Hf(4) | 3.4549(5)        |
| Hf(2)-Hf(5) | 3.5166(5)        |
| Hf(2)-Hf(3) | 3.5584(5)        |
| Hf(2)-H(2)  | 2.35(10)         |
| Hf(3)-O(8)  | 2.058(6)         |
| Hf(3)-O(2)  | 2.078(6)         |
| Hf(3)-O(29) | 2.115(6)         |
| Hf(3)-O(36) | 2.151(6)         |
| Hf(3)-O(25) | 2.201(6)         |
| Hf(3)-O(4)  | 2.253(7)         |
| Hf(3)-O(12) | 2.283(6)         |
| Hf(3)-O(5)  | 2.375(6)         |
| Hf(3)-Hf(6) | 3.4762(5)        |
| Hf(3)-Hf(4) | 3.4768(5)        |
| Hf(3)-Hf(5) | 3.5390(6)        |

|             |           |
|-------------|-----------|
| Hf(3)-H(2)  | 2.30(10)  |
| Hf(4)-O(2)  | 2.024(6)  |
| Hf(4)-O(3)  | 2.087(6)  |
| Hf(4)-O(26) | 2.185(7)  |
| Hf(4)-O(1)  | 2.195(7)  |
| Hf(4)-O(5)  | 2.198(6)  |
| Hf(4)-O(17) | 2.205(6)  |
| Hf(4)-O(16) | 2.239(6)  |
| Hf(4)-O(15) | 2.312(6)  |
| Hf(4)-C(13) | 2.672(9)  |
| Hf(5)-O(8)  | 2.035(7)  |
| Hf(5)-O(6)  | 2.049(6)  |
| Hf(5)-O(23) | 2.171(6)  |
| Hf(5)-O(11) | 2.171(7)  |
| Hf(5)-O(21) | 2.178(6)  |
| Hf(5)-O(9)  | 2.194(7)  |
| Hf(5)-O(7)  | 2.350(6)  |
| Hf(5)-O(4)  | 2.390(7)  |
| Hf(5)-Hf(6) | 3.4611(5) |
| Hf(6)-O(8)  | 2.032(6)  |
| Hf(6)-O(3)  | 2.100(6)  |
| Hf(6)-O(22) | 2.201(7)  |
| Hf(6)-O(5)  | 2.201(7)  |
| Hf(6)-O(7)  | 2.223(6)  |
| Hf(6)-O(37) | 2.227(7)  |
| Hf(6)-O(19) | 2.251(6)  |
| Hf(6)-O(20) | 2.261(6)  |
| Hf(6)-C(21) | 2.608(10) |
| O(2)-H(2)   | 0.95(2)   |
| O(4)-H(4)   | 0.85(2)   |
| O(5)-H(5)   | 0.85(2)   |
| O(7)-H(7)   | 0.893(17) |
| C(1)-O(10)  | 1.257(11) |
| C(1)-O(9)   | 1.262(11) |
| C(1)-C(2)   | 1.515(14) |
| C(2)-C(4)   | 1.50(2)   |
| C(2)-C(3)   | 1.475(16) |
| C(2)-H(2A)  | 1.0000    |
| C(3)-H(3A)  | 0.9800    |
| C(3)-H(3B)  | 0.9800    |
| C(3)-H(3C)  | 0.9800    |
| C(4)-H(4A)  | 0.9800    |
| C(4)-H(4B)  | 0.9800    |
| C(4)-H(4C)  | 0.9800    |
| C(5)-O(12)  | 1.250(12) |
| C(5)-O(11)  | 1.277(12) |
| C(5)-C(6)   | 1.529(13) |
| C(6)-C(7)   | 1.496(15) |
| C(6)-C(8)   | 1.515(15) |
| C(6)-H(6A)  | 1.0000    |
| C(7)-H(7A)  | 0.9800    |

|              |           |
|--------------|-----------|
| C(7)-H(7B)   | 0.9800    |
| C(7)-H(7C)   | 0.9800    |
| C(8)-H(8A)   | 0.9800    |
| C(8)-H(8B)   | 0.9800    |
| C(8)-H(8C)   | 0.9800    |
| C(9)-O(14)   | 1.270(12) |
| C(9)-O(13)   | 1.273(12) |
| C(9)-C(10)   | 1.512(16) |
| C(10)-C(11)  | 1.444(18) |
| C(10)-C(12)  | 1.506(16) |
| C(10)-H(10A) | 1.0000    |
| C(11)-H(11A) | 0.9800    |
| C(11)-H(11B) | 0.9800    |
| C(11)-H(11C) | 0.9800    |
| C(12)-H(12A) | 0.9800    |
| C(12)-H(12B) | 0.9800    |
| C(12)-H(12C) | 0.9800    |
| C(13)-O(15)  | 1.279(11) |
| C(13)-O(16)  | 1.285(11) |
| C(13)-C(14)  | 1.509(13) |
| C(14)-C(15)  | 1.526(14) |
| C(14)-C(16)  | 1.547(14) |
| C(14)-H(14A) | 1.0000    |
| C(15)-H(15A) | 0.9800    |
| C(15)-H(15B) | 0.9800    |
| C(15)-H(15C) | 0.9800    |
| C(16)-H(16A) | 0.9800    |
| C(16)-H(16B) | 0.9800    |
| C(16)-H(16C) | 0.9800    |
| C(17)-O(18)  | 1.262(11) |
| C(17)-O(17)  | 1.268(11) |
| C(17)-C(18)  | 1.509(12) |
| C(18)-C(19)  | 1.531(15) |
| C(18)-C(20)  | 1.538(15) |
| C(18)-H(18A) | 1.0000    |
| C(19)-H(19A) | 0.9800    |
| C(19)-H(19B) | 0.9800    |
| C(19)-H(19C) | 0.9800    |
| C(20)-H(20A) | 0.9800    |
| C(20)-H(20B) | 0.9800    |
| C(20)-H(20C) | 0.9800    |
| C(21)-O(20)  | 1.274(12) |
| C(21)-O(19)  | 1.273(12) |
| C(21)-C(22)  | 1.512(13) |
| C(22)-C(24)  | 1.519(15) |
| C(22)-C(23)  | 1.528(14) |
| C(22)-H(22A) | 1.0000    |
| C(23)-H(23A) | 0.9800    |
| C(23)-H(23B) | 0.9800    |
| C(23)-H(23C) | 0.9800    |
| C(24)-H(24A) | 0.9800    |

|              |           |
|--------------|-----------|
| C(24)-H(24B) | 0.9800    |
| C(24)-H(24C) | 0.9800    |
| C(25)-O(21)  | 1.254(11) |
| C(25)-O(22)  | 1.268(12) |
| C(25)-C(26)  | 1.538(13) |
| C(26)-C(27)  | 1.535(16) |
| C(26)-C(28)  | 1.543(16) |
| C(26)-H(26A) | 1.0000    |
| C(27)-H(27A) | 0.9800    |
| C(27)-H(27B) | 0.9800    |
| C(27)-H(27C) | 0.9800    |
| C(28)-H(28A) | 0.9800    |
| C(28)-H(28B) | 0.9800    |
| C(28)-H(28C) | 0.9800    |
| C(29)-O(23)  | 1.267(10) |
| C(29)-O(24)  | 1.278(11) |
| C(29)-C(30)  | 1.502(13) |
| C(30)-C(31)  | 1.519(15) |
| C(30)-C(32)  | 1.531(14) |
| C(30)-H(30A) | 1.0000    |
| C(31)-H(31A) | 0.9800    |
| C(31)-H(31B) | 0.9800    |
| C(31)-H(31C) | 0.9800    |
| C(32)-H(32A) | 0.9800    |
| C(32)-H(32B) | 0.9800    |
| C(32)-H(32C) | 0.9800    |
| C(33)-O(25)  | 1.260(11) |
| C(33)-O(26)  | 1.270(11) |
| C(33)-C(34)  | 1.524(14) |
| C(34)-C(36)  | 1.516(15) |
| C(34)-C(35)  | 1.533(14) |
| C(34)-H(34A) | 1.0000    |
| C(35)-H(35A) | 0.9800    |
| C(35)-H(35B) | 0.9800    |
| C(35)-H(35C) | 0.9800    |
| C(36)-H(36A) | 0.9800    |
| C(36)-H(36B) | 0.9800    |
| C(36)-H(36C) | 0.9800    |
| C(37)-O(27)  | 1.210(12) |
| C(37)-O(28)  | 1.333(11) |
| C(37)-C(38)  | 1.517(14) |
| O(28)-H(28)  | 0.8400    |
| C(38)-C(39)  | 1.528(16) |
| C(38)-C(40)  | 1.543(16) |
| C(38)-H(38A) | 1.0000    |
| C(39)-H(39A) | 0.9800    |
| C(39)-H(39B) | 0.9800    |
| C(39)-H(39C) | 0.9800    |
| C(40)-H(40A) | 0.9800    |
| C(40)-H(40B) | 0.9800    |
| C(40)-H(40C) | 0.9800    |

|              |           |
|--------------|-----------|
| C(41)-O(42)  | 1.244(12) |
| C(41)-O(29)  | 1.254(11) |
| C(41)-C(43)  | 1.524(13) |
| C(43)-C(45)  | 1.538(14) |
| C(43)-C(44)  | 1.566(15) |
| C(43)-H(43A) | 1.0000    |
| C(44)-H(44A) | 0.9800    |
| C(44)-H(44B) | 0.9800    |
| C(44)-H(44C) | 0.9800    |
| C(45)-H(45A) | 0.9800    |
| C(45)-H(45B) | 0.9800    |
| C(45)-H(45C) | 0.9800    |
| C(46)-O(30)  | 1.195(14) |
| C(46)-O(31)  | 1.332(14) |
| C(46)-C(47)  | 1.504(16) |
| C(47)-C(48)  | 1.507(19) |
| C(47)-C(49)  | 1.52(2)   |
| C(47)-H(47A) | 1.0000    |
| O(31)-H(31)  | 0.8400    |
| C(48)-H(48A) | 0.9800    |
| C(48)-H(48B) | 0.9800    |
| C(48)-H(48C) | 0.9800    |
| C(49)-H(49A) | 0.9800    |
| C(49)-H(49B) | 0.9800    |
| C(49)-H(49C) | 0.9800    |
| C(50)-O(32)  | 1.221(13) |
| C(50)-O(33)  | 1.312(13) |
| C(50)-C(51)  | 1.520(15) |
| O(32)-H(32)  | 0.8400    |
| O(33)-H(33)  | 0.8400    |
| C(51)-C(53)  | 1.46(2)   |
| C(51)-C(52)  | 1.496(18) |
| C(51)-H(51A) | 1.0000    |
| C(52)-H(52A) | 0.9800    |
| C(52)-H(52B) | 0.9800    |
| C(52)-H(52C) | 0.9800    |
| C(53)-H(53A) | 0.9800    |
| C(53)-H(53B) | 0.9800    |
| C(53)-H(53C) | 0.9800    |
| C(54)-O(35)  | 1.246(11) |
| C(54)-O(34)  | 1.270(12) |
| C(54)-C(55)  | 1.509(14) |
| C(55)-C(57)  | 1.539(16) |
| C(55)-C(56)  | 1.543(15) |
| C(55)-H(55A) | 1.0000    |
| C(56)-H(56A) | 0.9800    |
| C(56)-H(56B) | 0.9800    |
| C(56)-H(56C) | 0.9800    |
| C(57)-H(57A) | 0.9800    |
| C(57)-H(57B) | 0.9800    |
| C(57)-H(57C) | 0.9800    |

|              |           |
|--------------|-----------|
| C(58)-O(37)  | 1.249(11) |
| C(58)-O(36)  | 1.258(11) |
| C(58)-C(59)  | 1.542(13) |
| C(59)-C(60)  | 1.513(15) |
| C(59)-C(61)  | 1.515(15) |
| C(59)-H(59A) | 1.0000    |
| O(38)-H(38C) | 0.959(10) |
| O(38)-H(38D) | 0.958(10) |
| C(60)-H(60A) | 0.9800    |
| C(60)-H(60B) | 0.9800    |
| C(60)-H(60C) | 0.9800    |
| C(61)-H(61A) | 0.9800    |
| C(61)-H(61B) | 0.9800    |
| C(61)-H(61C) | 0.9800    |

**Table S2.** Bond angles [deg.] for complex **IV**.

| <b>Complex IV</b> | <b>Bond Angles [deg.]</b> |
|-------------------|---------------------------|
| O(6)-Hf(1)-O(3)   | 94.7(3)                   |
| O(6)-Hf(1)-O(1)   | 73.6(2)                   |
| O(3)-Hf(1)-O(1)   | 70.0(2)                   |
| O(6)-Hf(1)-O(7)   | 73.9(2)                   |
| O(3)-Hf(1)-O(7)   | 71.4(2)                   |
| O(1)-Hf(1)-O(7)   | 126.2(2)                  |
| O(6)-Hf(1)-O(10)  | 83.6(3)                   |
| O(3)-Hf(1)-O(10)  | 144.8(2)                  |
| O(1)-Hf(1)-O(10)  | 140.8(2)                  |
| O(7)-Hf(1)-O(10)  | 74.4(2)                   |
| O(6)-Hf(1)-O(35)  | 83.2(2)                   |
| O(3)-Hf(1)-O(35)  | 142.2(2)                  |
| O(1)-Hf(1)-O(35)  | 73.3(2)                   |
| O(7)-Hf(1)-O(35)  | 141.6(2)                  |
| O(10)-Hf(1)-O(35) | 72.7(2)                   |
| O(6)-Hf(1)-O(14)  | 149.7(2)                  |
| O(3)-Hf(1)-O(14)  | 91.2(3)                   |
| O(1)-Hf(1)-O(14)  | 135.8(2)                  |
| O(7)-Hf(1)-O(14)  | 80.0(2)                   |
| O(10)-Hf(1)-O(14) | 74.8(2)                   |
| O(35)-Hf(1)-O(14) | 109.4(2)                  |
| O(6)-Hf(1)-O(13)  | 152.2(2)                  |
| O(3)-Hf(1)-O(13)  | 90.0(3)                   |
| O(1)-Hf(1)-O(13)  | 82.4(2)                   |
| O(7)-Hf(1)-O(13)  | 133.1(2)                  |
| O(10)-Hf(1)-O(13) | 107.8(3)                  |
| O(35)-Hf(1)-O(13) | 76.5(2)                   |
| O(14)-Hf(1)-O(13) | 57.2(2)                   |
| O(6)-Hf(1)-C(9)   | 173.3(3)                  |
| O(3)-Hf(1)-C(9)   | 91.9(3)                   |
| O(1)-Hf(1)-C(9)   | 109.9(3)                  |
| O(7)-Hf(1)-C(9)   | 107.3(3)                  |
| O(10)-Hf(1)-C(9)  | 90.4(3)                   |

|                   |            |
|-------------------|------------|
| O(35)-Hf(1)-C(9)  | 92.2(3)    |
| O(14)-Hf(1)-C(9)  | 28.6(3)    |
| O(13)-Hf(1)-C(9)  | 28.6(3)    |
| O(6)-Hf(1)-Hf(5)  | 32.15(16)  |
| O(3)-Hf(1)-Hf(5)  | 86.00(17)  |
| O(1)-Hf(1)-Hf(5)  | 99.47(16)  |
| O(7)-Hf(1)-Hf(5)  | 42.00(16)  |
| O(10)-Hf(1)-Hf(5) | 73.89(16)  |
| O(35)-Hf(1)-Hf(5) | 108.81(16) |
| O(14)-Hf(1)-Hf(5) | 119.33(16) |
| O(13)-Hf(1)-Hf(5) | 174.64(18) |
| C(9)-Hf(1)-Hf(5)  | 147.9(2)   |
| O(6)-Hf(1)-Hf(2)  | 31.38(17)  |
| O(3)-Hf(1)-Hf(2)  | 85.75(17)  |
| O(1)-Hf(1)-Hf(2)  | 42.44(16)  |
| O(7)-Hf(1)-Hf(2)  | 99.40(16)  |
| O(10)-Hf(1)-Hf(2) | 107.99(17) |
| O(35)-Hf(1)-Hf(2) | 72.95(16)  |
| O(14)-Hf(1)-Hf(2) | 176.95(19) |
| O(13)-Hf(1)-Hf(2) | 122.34(17) |
| C(9)-Hf(1)-Hf(2)  | 151.0(2)   |
| Hf(5)-Hf(1)-Hf(2) | 60.930(11) |
| O(6)-Hf(1)-Hf(6)  | 81.41(17)  |
| O(3)-Hf(1)-Hf(6)  | 33.59(17)  |
| O(1)-Hf(1)-Hf(6)  | 95.58(17)  |
| O(7)-Hf(1)-Hf(6)  | 37.94(16)  |
| O(10)-Hf(1)-Hf(6) | 112.22(16) |
| O(35)-Hf(1)-Hf(6) | 163.13(16) |
| O(14)-Hf(1)-Hf(6) | 87.45(18)  |
| O(13)-Hf(1)-Hf(6) | 115.30(18) |
| C(9)-Hf(1)-Hf(6)  | 103.7(2)   |
| Hf(5)-Hf(1)-Hf(6) | 59.624(11) |
| Hf(2)-Hf(1)-Hf(6) | 90.259(13) |
| O(6)-Hf(2)-O(2)   | 90.6(3)    |
| O(6)-Hf(2)-O(34)  | 84.8(2)    |
| O(2)-Hf(2)-O(34)  | 142.3(2)   |
| O(6)-Hf(2)-O(18)  | 142.7(2)   |
| O(2)-Hf(2)-O(18)  | 82.9(2)    |
| O(34)-Hf(2)-O(18) | 78.6(2)    |
| O(6)-Hf(2)-O(38)  | 144.4(2)   |
| O(2)-Hf(2)-O(38)  | 91.5(3)    |
| O(34)-Hf(2)-O(38) | 113.5(2)   |
| O(18)-Hf(2)-O(38) | 72.7(2)    |
| O(6)-Hf(2)-O(24)  | 81.5(2)    |
| O(2)-Hf(2)-O(24)  | 142.4(2)   |
| O(34)-Hf(2)-O(24) | 73.9(2)    |
| O(18)-Hf(2)-O(24) | 124.2(2)   |
| O(38)-Hf(2)-O(24) | 75.4(3)    |
| O(6)-Hf(2)-O(4)   | 72.7(2)    |
| O(2)-Hf(2)-O(4)   | 68.6(2)    |
| O(34)-Hf(2)-O(4)  | 142.9(2)   |

|                   |            |
|-------------------|------------|
| O(18)-Hf(2)-O(4)  | 135.9(2)   |
| O(38)-Hf(2)-O(4)  | 75.1(2)    |
| O(24)-Hf(2)-O(4)  | 73.9(2)    |
| O(6)-Hf(2)-O(1)   | 69.8(2)    |
| O(2)-Hf(2)-O(1)   | 70.6(2)    |
| O(34)-Hf(2)-O(1)  | 72.7(2)    |
| O(18)-Hf(2)-O(1)  | 73.4(2)    |
| O(38)-Hf(2)-O(1)  | 143.3(2)   |
| O(24)-Hf(2)-O(1)  | 137.3(2)   |
| O(4)-Hf(2)-O(1)   | 123.1(2)   |
| O(6)-Hf(2)-Hf(4)  | 82.01(18)  |
| O(2)-Hf(2)-Hf(4)  | 31.83(17)  |
| O(34)-Hf(2)-Hf(4) | 110.64(17) |
| O(18)-Hf(2)-Hf(4) | 73.21(16)  |
| O(38)-Hf(2)-Hf(4) | 115.90(19) |
| O(24)-Hf(2)-Hf(4) | 162.39(16) |
| O(4)-Hf(2)-Hf(4)  | 95.25(16)  |
| O(1)-Hf(2)-Hf(4)  | 38.96(16)  |
| O(6)-Hf(2)-Hf(1)  | 31.54(17)  |
| O(2)-Hf(2)-Hf(1)  | 82.74(18)  |
| O(34)-Hf(2)-Hf(1) | 73.92(16)  |
| O(18)-Hf(2)-Hf(1) | 111.25(16) |
| O(38)-Hf(2)-Hf(1) | 172.45(17) |
| O(24)-Hf(2)-Hf(1) | 106.30(17) |
| O(4)-Hf(2)-Hf(1)  | 98.15(16)  |
| O(1)-Hf(2)-Hf(1)  | 38.52(15)  |
| Hf(4)-Hf(2)-Hf(1) | 60.714(11) |
| O(6)-Hf(2)-Hf(5)  | 30.61(17)  |
| O(2)-Hf(2)-Hf(5)  | 81.75(17)  |
| O(34)-Hf(2)-Hf(5) | 109.70(17) |
| O(18)-Hf(2)-Hf(5) | 162.98(16) |
| O(38)-Hf(2)-Hf(5) | 114.99(16) |
| O(24)-Hf(2)-Hf(5) | 72.78(15)  |
| O(4)-Hf(2)-Hf(5)  | 42.24(17)  |
| O(1)-Hf(2)-Hf(5)  | 94.47(14)  |
| Hf(4)-Hf(2)-Hf(5) | 89.837(12) |
| Hf(1)-Hf(2)-Hf(5) | 59.442(10) |
| O(6)-Hf(2)-Hf(3)  | 81.09(18)  |
| O(2)-Hf(2)-Hf(3)  | 30.76(17)  |
| O(34)-Hf(2)-Hf(3) | 163.74(16) |
| O(18)-Hf(2)-Hf(3) | 108.14(17) |
| O(38)-Hf(2)-Hf(3) | 82.77(17)  |
| O(24)-Hf(2)-Hf(3) | 111.70(16) |
| O(4)-Hf(2)-Hf(3)  | 37.83(17)  |
| O(1)-Hf(2)-Hf(3)  | 94.71(15)  |
| Hf(4)-Hf(2)-Hf(3) | 59.417(11) |
| Hf(1)-Hf(2)-Hf(3) | 89.817(12) |
| Hf(5)-Hf(2)-Hf(3) | 60.026(11) |
| O(6)-Hf(2)-H(2)   | 113.5(15)  |
| O(2)-Hf(2)-H(2)   | 23.7(14)   |
| O(34)-Hf(2)-H(2)  | 145(3)     |

|                   |            |
|-------------------|------------|
| O(18)-Hf(2)-H(2)  | 69(2)      |
| O(38)-Hf(2)-H(2)  | 69.6(16)   |
| O(24)-Hf(2)-H(2)  | 136(2)     |
| O(4)-Hf(2)-H(2)   | 72(3)      |
| O(1)-Hf(2)-H(2)   | 85(2)      |
| Hf(4)-Hf(2)-H(2)  | 47.8(19)   |
| Hf(1)-Hf(2)-H(2)  | 105.4(15)  |
| Hf(5)-Hf(2)-H(2)  | 99(2)      |
| Hf(3)-Hf(2)-H(2)  | 40(2)      |
| O(8)-Hf(3)-O(2)   | 89.3(3)    |
| O(8)-Hf(3)-O(29)  | 146.0(2)   |
| O(2)-Hf(3)-O(29)  | 97.3(2)    |
| O(8)-Hf(3)-O(36)  | 85.8(2)    |
| O(2)-Hf(3)-O(36)  | 142.8(2)   |
| O(29)-Hf(3)-O(36) | 107.1(2)   |
| O(8)-Hf(3)-O(25)  | 141.1(2)   |
| O(2)-Hf(3)-O(25)  | 82.7(3)    |
| O(29)-Hf(3)-O(25) | 72.9(2)    |
| O(36)-Hf(3)-O(25) | 78.4(2)    |
| O(8)-Hf(3)-O(4)   | 71.6(2)    |
| O(2)-Hf(3)-O(4)   | 68.2(2)    |
| O(29)-Hf(3)-O(4)  | 80.1(2)    |
| O(36)-Hf(3)-O(4)  | 142.5(2)   |
| O(25)-Hf(3)-O(4)  | 137.0(2)   |
| O(8)-Hf(3)-O(12)  | 79.6(2)    |
| O(2)-Hf(3)-O(12)  | 141.3(3)   |
| O(29)-Hf(3)-O(12) | 74.5(2)    |
| O(36)-Hf(3)-O(12) | 73.7(2)    |
| O(25)-Hf(3)-O(12) | 127.8(2)   |
| O(4)-Hf(3)-O(12)  | 73.1(2)    |
| O(8)-Hf(3)-O(5)   | 69.9(2)    |
| O(2)-Hf(3)-O(5)   | 70.0(2)    |
| O(29)-Hf(3)-O(5)  | 143.4(2)   |
| O(36)-Hf(3)-O(5)  | 73.8(2)    |
| O(25)-Hf(3)-O(5)  | 71.6(2)    |
| O(4)-Hf(3)-O(5)   | 122.3(2)   |
| O(12)-Hf(3)-O(5)  | 136.4(2)   |
| O(8)-Hf(3)-Hf(6)  | 31.56(17)  |
| O(2)-Hf(3)-Hf(6)  | 82.35(17)  |
| O(29)-Hf(3)-Hf(6) | 177.47(18) |
| O(36)-Hf(3)-Hf(6) | 74.41(17)  |
| O(25)-Hf(3)-Hf(6) | 109.56(16) |
| O(4)-Hf(3)-Hf(6)  | 97.52(17)  |
| O(12)-Hf(3)-Hf(6) | 104.16(16) |
| O(5)-Hf(3)-Hf(6)  | 38.74(16)  |
| O(8)-Hf(3)-Hf(4)  | 81.32(18)  |
| O(2)-Hf(3)-Hf(4)  | 31.56(17)  |
| O(29)-Hf(3)-Hf(4) | 120.04(17) |
| O(36)-Hf(3)-Hf(4) | 111.44(16) |
| O(25)-Hf(3)-Hf(4) | 72.05(17)  |
| O(4)-Hf(3)-Hf(4)  | 94.67(16)  |

|                   |            |
|-------------------|------------|
| O(12)-Hf(3)-Hf(4) | 159.79(17) |
| O(5)-Hf(3)-Hf(4)  | 38.64(15)  |
| Hf(6)-Hf(3)-Hf(4) | 60.694(10) |
| O(8)-Hf(3)-Hf(5)  | 29.98(17)  |
| O(2)-Hf(3)-Hf(5)  | 80.9(2)    |
| O(29)-Hf(3)-Hf(5) | 118.35(18) |
| O(36)-Hf(3)-Hf(5) | 109.89(18) |
| O(25)-Hf(3)-Hf(5) | 161.16(17) |
| O(4)-Hf(3)-Hf(5)  | 41.79(16)  |
| O(12)-Hf(3)-Hf(5) | 70.99(18)  |
| O(5)-Hf(3)-Hf(5)  | 94.06(16)  |
| Hf(6)-Hf(3)-Hf(5) | 59.117(11) |
| Hf(4)-Hf(3)-Hf(5) | 89.116(13) |
| O(8)-Hf(3)-Hf(2)  | 79.74(18)  |
| O(2)-Hf(3)-Hf(2)  | 30.39(19)  |
| O(29)-Hf(3)-Hf(2) | 89.32(18)  |
| O(36)-Hf(3)-Hf(2) | 163.57(17) |
| O(25)-Hf(3)-Hf(2) | 108.23(16) |
| O(4)-Hf(3)-Hf(2)  | 37.84(15)  |
| O(12)-Hf(3)-Hf(2) | 110.92(17) |
| O(5)-Hf(3)-Hf(2)  | 93.79(15)  |
| Hf(6)-Hf(3)-Hf(2) | 89.173(13) |
| Hf(4)-Hf(3)-Hf(2) | 58.810(11) |
| Hf(5)-Hf(3)-Hf(2) | 59.401(11) |
| O(8)-Hf(3)-H(2)   | 113.0(14)  |
| O(2)-Hf(3)-H(2)   | 24.3(12)   |
| O(29)-Hf(3)-H(2)  | 74.7(15)   |
| O(36)-Hf(3)-H(2)  | 144(3)     |
| O(25)-Hf(3)-H(2)  | 68(2)      |
| O(4)-Hf(3)-H(2)   | 73(3)      |
| O(12)-Hf(3)-H(2)  | 138(3)     |
| O(5)-Hf(3)-H(2)   | 84(2)      |
| Hf(6)-Hf(3)-H(2)  | 105.3(15)  |
| Hf(4)-Hf(3)-H(2)  | 47.4(19)   |
| Hf(5)-Hf(3)-H(2)  | 99(2)      |
| Hf(2)-Hf(3)-H(2)  | 41(2)      |
| O(2)-Hf(4)-O(3)   | 96.1(3)    |
| O(2)-Hf(4)-O(26)  | 84.9(3)    |
| O(3)-Hf(4)-O(26)  | 143.9(2)   |
| O(2)-Hf(4)-O(1)   | 75.0(3)    |
| O(3)-Hf(4)-O(1)   | 70.0(2)    |
| O(26)-Hf(4)-O(1)  | 143.2(2)   |
| O(2)-Hf(4)-O(5)   | 74.7(2)    |
| O(3)-Hf(4)-O(5)   | 69.9(2)    |
| O(26)-Hf(4)-O(5)  | 75.7(2)    |
| O(1)-Hf(4)-O(5)   | 125.8(2)   |
| O(2)-Hf(4)-O(17)  | 85.1(2)    |
| O(3)-Hf(4)-O(17)  | 142.1(2)   |
| O(26)-Hf(4)-O(17) | 74.0(2)    |
| O(1)-Hf(4)-O(17)  | 73.8(2)    |
| O(5)-Hf(4)-O(17)  | 144.8(2)   |

|                   |            |
|-------------------|------------|
| O(2)-Hf(4)-O(16)  | 150.6(3)   |
| O(3)-Hf(4)-O(16)  | 87.3(2)    |
| O(26)-Hf(4)-O(16) | 75.6(2)    |
| O(1)-Hf(4)-O(16)  | 132.8(2)   |
| O(5)-Hf(4)-O(16)  | 79.2(2)    |
| O(17)-Hf(4)-O(16) | 109.8(2)   |
| O(2)-Hf(4)-O(15)  | 152.3(3)   |
| O(3)-Hf(4)-O(15)  | 84.9(2)    |
| O(26)-Hf(4)-O(15) | 110.4(2)   |
| O(1)-Hf(4)-O(15)  | 79.5(2)    |
| O(5)-Hf(4)-O(15)  | 130.4(2)   |
| O(17)-Hf(4)-O(15) | 77.7(2)    |
| O(16)-Hf(4)-O(15) | 57.0(2)    |
| O(2)-Hf(4)-C(13)  | 178.8(3)   |
| O(3)-Hf(4)-C(13)  | 83.0(3)    |
| O(26)-Hf(4)-C(13) | 95.3(3)    |
| O(1)-Hf(4)-C(13)  | 105.5(3)   |
| O(5)-Hf(4)-C(13)  | 104.1(2)   |
| O(17)-Hf(4)-C(13) | 96.2(2)    |
| O(16)-Hf(4)-C(13) | 28.6(3)    |
| O(15)-Hf(4)-C(13) | 28.6(3)    |
| O(2)-Hf(4)-Hf(2)  | 32.4(2)    |
| O(3)-Hf(4)-Hf(2)  | 86.30(18)  |
| O(26)-Hf(4)-Hf(2) | 110.58(16) |
| O(1)-Hf(4)-Hf(2)  | 42.80(16)  |
| O(5)-Hf(4)-Hf(2)  | 100.07(17) |
| O(17)-Hf(4)-Hf(2) | 74.61(17)  |
| O(16)-Hf(4)-Hf(2) | 173.45(17) |
| O(15)-Hf(4)-Hf(2) | 120.71(17) |
| C(13)-Hf(4)-Hf(2) | 148.2(2)   |
| O(2)-Hf(4)-Hf(3)  | 32.51(18)  |
| O(3)-Hf(4)-Hf(3)  | 86.23(18)  |
| O(26)-Hf(4)-Hf(3) | 75.38(17)  |
| O(1)-Hf(4)-Hf(3)  | 100.45(16) |
| O(5)-Hf(4)-Hf(3)  | 42.45(16)  |
| O(17)-Hf(4)-Hf(3) | 111.47(16) |
| O(16)-Hf(4)-Hf(3) | 119.37(16) |
| O(15)-Hf(4)-Hf(3) | 170.56(16) |
| C(13)-Hf(4)-Hf(3) | 146.39(19) |
| Hf(2)-Hf(4)-Hf(3) | 61.773(11) |
| O(2)-Hf(4)-Hf(1)  | 82.4(2)    |
| O(3)-Hf(4)-Hf(1)  | 33.28(18)  |
| O(26)-Hf(4)-Hf(1) | 165.97(17) |
| O(1)-Hf(4)-Hf(1)  | 36.96(16)  |
| O(5)-Hf(4)-Hf(1)  | 95.19(17)  |
| O(17)-Hf(4)-Hf(1) | 110.58(18) |
| O(16)-Hf(4)-Hf(1) | 113.63(17) |
| O(15)-Hf(4)-Hf(1) | 83.65(17)  |
| C(13)-Hf(4)-Hf(1) | 97.3(2)    |
| Hf(2)-Hf(4)-Hf(1) | 59.875(11) |
| Hf(3)-Hf(4)-Hf(1) | 90.686(13) |

|                   |            |
|-------------------|------------|
| O(8)-Hf(5)-O(6)   | 89.6(3)    |
| O(8)-Hf(5)-O(23)  | 141.2(2)   |
| O(6)-Hf(5)-O(23)  | 83.4(2)    |
| O(8)-Hf(5)-O(11)  | 85.4(3)    |
| O(6)-Hf(5)-O(11)  | 141.8(2)   |
| O(23)-Hf(5)-O(11) | 77.4(2)    |
| O(8)-Hf(5)-O(21)  | 85.3(2)    |
| O(6)-Hf(5)-O(21)  | 143.1(2)   |
| O(23)-Hf(5)-O(21) | 121.7(2)   |
| O(11)-Hf(5)-O(21) | 74.2(2)    |
| O(8)-Hf(5)-O(9)   | 143.1(2)   |
| O(6)-Hf(5)-O(9)   | 84.0(2)    |
| O(23)-Hf(5)-O(9)  | 74.1(2)    |
| O(11)-Hf(5)-O(9)  | 120.9(3)   |
| O(21)-Hf(5)-O(9)  | 78.7(2)    |
| O(8)-Hf(5)-O(7)   | 70.8(2)    |
| O(6)-Hf(5)-O(7)   | 70.4(2)    |
| O(23)-Hf(5)-O(7)  | 139.4(2)   |
| O(11)-Hf(5)-O(7)  | 141.0(2)   |
| O(21)-Hf(5)-O(7)  | 73.5(2)    |
| O(9)-Hf(5)-O(7)   | 72.8(2)    |
| O(8)-Hf(5)-O(4)   | 69.1(2)    |
| O(6)-Hf(5)-O(4)   | 69.5(2)    |
| O(23)-Hf(5)-O(4)  | 72.7(2)    |
| O(11)-Hf(5)-O(4)  | 73.4(2)    |
| O(21)-Hf(5)-O(4)  | 139.8(2)   |
| O(9)-Hf(5)-O(4)   | 139.3(2)   |
| O(7)-Hf(5)-O(4)   | 122.2(2)   |
| O(8)-Hf(5)-Hf(6)  | 31.65(18)  |
| O(6)-Hf(5)-Hf(6)  | 82.22(17)  |
| O(23)-Hf(5)-Hf(6) | 163.82(17) |
| O(11)-Hf(5)-Hf(6) | 110.14(18) |
| O(21)-Hf(5)-Hf(6) | 74.44(17)  |
| O(9)-Hf(5)-Hf(6)  | 111.53(17) |
| O(7)-Hf(5)-Hf(6)  | 39.47(15)  |
| O(4)-Hf(5)-Hf(6)  | 95.26(16)  |
| O(8)-Hf(5)-Hf(1)  | 81.88(18)  |
| O(6)-Hf(5)-Hf(1)  | 31.98(16)  |
| O(23)-Hf(5)-Hf(1) | 108.81(17) |
| O(11)-Hf(5)-Hf(1) | 165.55(19) |
| O(21)-Hf(5)-Hf(1) | 111.26(17) |
| O(9)-Hf(5)-Hf(1)  | 73.59(17)  |
| O(7)-Hf(5)-Hf(1)  | 38.61(14)  |
| O(4)-Hf(5)-Hf(1)  | 95.64(15)  |
| Hf(6)-Hf(5)-Hf(1) | 60.654(11) |
| O(8)-Hf(5)-Hf(2)  | 81.07(16)  |
| O(6)-Hf(5)-Hf(2)  | 30.29(17)  |
| O(23)-Hf(5)-Hf(2) | 73.73(17)  |
| O(11)-Hf(5)-Hf(2) | 111.70(17) |
| O(21)-Hf(5)-Hf(2) | 164.54(18) |
| O(9)-Hf(5)-Hf(2)  | 108.24(16) |

|                   |            |
|-------------------|------------|
| O(7)-Hf(5)-Hf(2)  | 95.03(14)  |
| O(4)-Hf(5)-Hf(2)  | 39.33(15)  |
| Hf(6)-Hf(5)-Hf(2) | 90.102(12) |
| Hf(1)-Hf(5)-Hf(2) | 59.628(10) |
| O(8)-Hf(5)-Hf(3)  | 30.34(17)  |
| O(6)-Hf(5)-Hf(3)  | 81.36(19)  |
| O(23)-Hf(5)-Hf(3) | 110.91(17) |
| O(11)-Hf(5)-Hf(3) | 75.31(19)  |
| O(21)-Hf(5)-Hf(3) | 109.39(18) |
| O(9)-Hf(5)-Hf(3)  | 163.76(17) |
| O(7)-Hf(5)-Hf(3)  | 95.55(15)  |
| O(4)-Hf(5)-Hf(3)  | 38.92(16)  |
| Hf(6)-Hf(5)-Hf(3) | 59.538(11) |
| Hf(1)-Hf(5)-Hf(3) | 90.244(13) |
| Hf(2)-Hf(5)-Hf(3) | 60.573(11) |
| O(8)-Hf(6)-O(3)   | 94.5(2)    |
| O(8)-Hf(6)-O(22)  | 83.2(2)    |
| O(3)-Hf(6)-O(22)  | 143.9(3)   |
| O(8)-Hf(6)-O(5)   | 74.1(2)    |
| O(3)-Hf(6)-O(5)   | 69.6(2)    |
| O(22)-Hf(6)-O(5)  | 141.7(2)   |
| O(8)-Hf(6)-O(7)   | 73.6(2)    |
| O(3)-Hf(6)-O(7)   | 70.7(2)    |
| O(22)-Hf(6)-O(7)  | 74.2(2)    |
| O(5)-Hf(6)-O(7)   | 125.6(2)   |
| O(8)-Hf(6)-O(37)  | 83.1(2)    |
| O(3)-Hf(6)-O(37)  | 143.0(2)   |
| O(22)-Hf(6)-O(37) | 72.7(2)    |
| O(5)-Hf(6)-O(37)  | 74.3(2)    |
| O(7)-Hf(6)-O(37)  | 141.4(2)   |
| O(8)-Hf(6)-O(19)  | 151.4(3)   |
| O(3)-Hf(6)-O(19)  | 92.1(2)    |
| O(22)-Hf(6)-O(19) | 107.0(2)   |
| O(5)-Hf(6)-O(19)  | 82.3(2)    |
| O(7)-Hf(6)-O(19)  | 134.5(2)   |
| O(37)-Hf(6)-O(19) | 75.0(2)    |
| O(8)-Hf(6)-O(20)  | 149.5(3)   |
| O(3)-Hf(6)-O(20)  | 89.1(2)    |
| O(22)-Hf(6)-O(20) | 76.4(2)    |
| O(5)-Hf(6)-O(20)  | 134.8(2)   |
| O(7)-Hf(6)-O(20)  | 79.1(2)    |
| O(37)-Hf(6)-O(20) | 111.4(2)   |
| O(19)-Hf(6)-O(20) | 58.3(3)    |
| O(8)-Hf(6)-C(21)  | 172.5(3)   |
| O(3)-Hf(6)-C(21)  | 92.9(3)    |
| O(22)-Hf(6)-C(21) | 90.0(3)    |
| O(5)-Hf(6)-C(21)  | 110.0(3)   |
| O(7)-Hf(6)-C(21)  | 107.7(3)   |
| O(37)-Hf(6)-C(21) | 91.8(3)    |
| O(19)-Hf(6)-C(21) | 29.2(3)    |
| O(20)-Hf(6)-C(21) | 29.2(3)    |

|                   |            |
|-------------------|------------|
| O(8)-Hf(6)-Hf(5)  | 31.71(19)  |
| O(3)-Hf(6)-Hf(5)  | 86.03(18)  |
| O(22)-Hf(6)-Hf(5) | 73.17(17)  |
| O(5)-Hf(6)-Hf(5)  | 99.57(16)  |
| O(7)-Hf(6)-Hf(5)  | 42.20(16)  |
| O(37)-Hf(6)-Hf(5) | 108.07(16) |
| O(19)-Hf(6)-Hf(5) | 176.69(17) |
| O(20)-Hf(6)-Hf(5) | 118.87(18) |
| C(21)-Hf(6)-Hf(5) | 148.1(2)   |
| O(8)-Hf(6)-Hf(3)  | 32.00(18)  |
| O(3)-Hf(6)-Hf(3)  | 86.06(17)  |
| O(22)-Hf(6)-Hf(3) | 107.94(17) |
| O(5)-Hf(6)-Hf(3)  | 42.47(16)  |
| O(7)-Hf(6)-Hf(3)  | 99.78(16)  |
| O(37)-Hf(6)-Hf(3) | 72.44(16)  |
| O(19)-Hf(6)-Hf(3) | 121.31(17) |
| O(20)-Hf(6)-Hf(3) | 175.14(17) |
| C(21)-Hf(6)-Hf(3) | 150.5(2)   |
| Hf(5)-Hf(6)-Hf(3) | 61.346(11) |
| O(8)-Hf(6)-Hf(1)  | 81.08(19)  |
| O(3)-Hf(6)-Hf(1)  | 33.51(19)  |
| O(22)-Hf(6)-Hf(1) | 111.42(18) |
| O(5)-Hf(6)-Hf(1)  | 95.22(16)  |
| O(7)-Hf(6)-Hf(1)  | 37.30(15)  |
| O(37)-Hf(6)-Hf(1) | 162.99(16) |
| O(19)-Hf(6)-Hf(1) | 117.52(16) |
| O(20)-Hf(6)-Hf(1) | 85.50(18)  |
| C(21)-Hf(6)-Hf(1) | 104.5(2)   |
| Hf(5)-Hf(6)-Hf(1) | 59.722(11) |
| Hf(3)-Hf(6)-Hf(1) | 90.751(12) |
| Hf(1)-O(1)-Hf(4)  | 106.0(2)   |
| Hf(1)-O(1)-Hf(2)  | 99.0(2)    |
| Hf(4)-O(1)-Hf(2)  | 98.2(2)    |
| Hf(4)-O(2)-Hf(2)  | 115.8(3)   |
| Hf(4)-O(2)-Hf(3)  | 115.9(3)   |
| Hf(2)-O(2)-Hf(3)  | 118.9(3)   |
| Hf(4)-O(2)-H(2)   | 114(6)     |
| Hf(2)-O(2)-H(2)   | 96(7)      |
| Hf(3)-O(2)-H(2)   | 91(7)      |
| Hf(4)-O(3)-Hf(1)  | 113.6(3)   |
| Hf(4)-O(3)-Hf(6)  | 114.0(3)   |
| Hf(1)-O(3)-Hf(6)  | 112.9(3)   |
| Hf(2)-O(4)-Hf(3)  | 104.3(2)   |
| Hf(2)-O(4)-Hf(5)  | 98.4(3)    |
| Hf(3)-O(4)-Hf(5)  | 99.3(2)    |
| Hf(2)-O(4)-H(4)   | 105(7)     |
| Hf(3)-O(4)-H(4)   | 135(8)     |
| Hf(5)-O(4)-H(4)   | 109(7)     |
| Hf(4)-O(5)-Hf(6)  | 106.0(3)   |
| Hf(4)-O(5)-Hf(3)  | 98.9(2)    |
| Hf(6)-O(5)-Hf(3)  | 98.8(3)    |

|                  |           |
|------------------|-----------|
| Hf(4)-O(5)-H(5)  | 123(7)    |
| Hf(6)-O(5)-H(5)  | 114(7)    |
| Hf(3)-O(5)-H(5)  | 113(7)    |
| Hf(2)-O(6)-Hf(1) | 117.1(3)  |
| Hf(2)-O(6)-Hf(5) | 119.1(3)  |
| Hf(1)-O(6)-Hf(5) | 115.9(3)  |
| Hf(1)-O(7)-Hf(6) | 104.8(2)  |
| Hf(1)-O(7)-Hf(5) | 99.4(2)   |
| Hf(6)-O(7)-Hf(5) | 98.3(2)   |
| Hf(1)-O(7)-H(7)  | 121(3)    |
| Hf(6)-O(7)-H(7)  | 118(3)    |
| Hf(5)-O(7)-H(7)  | 111(3)    |
| Hf(6)-O(8)-Hf(5) | 116.6(3)  |
| Hf(6)-O(8)-Hf(3) | 116.4(3)  |
| Hf(5)-O(8)-Hf(3) | 119.7(3)  |
| O(10)-C(1)-O(9)  | 124.9(9)  |
| O(10)-C(1)-C(2)  | 117.0(9)  |
| O(9)-C(1)-C(2)   | 118.1(9)  |
| C(1)-O(9)-Hf(5)  | 133.7(6)  |
| C(1)-O(10)-Hf(1) | 133.0(6)  |
| C(4)-C(2)-C(3)   | 111.9(13) |
| C(4)-C(2)-C(1)   | 108.6(11) |
| C(3)-C(2)-C(1)   | 114.0(10) |
| C(4)-C(2)-H(2A)  | 107.3     |
| C(3)-C(2)-H(2A)  | 107.3     |
| C(1)-C(2)-H(2A)  | 107.3     |
| C(2)-C(3)-H(3A)  | 109.5     |
| C(2)-C(3)-H(3B)  | 109.5     |
| H(3A)-C(3)-H(3B) | 109.5     |
| C(2)-C(3)-H(3C)  | 109.5     |
| H(3A)-C(3)-H(3C) | 109.5     |
| H(3B)-C(3)-H(3C) | 109.5     |
| C(2)-C(4)-H(4A)  | 109.5     |
| C(2)-C(4)-H(4B)  | 109.5     |
| H(4A)-C(4)-H(4B) | 109.5     |
| C(2)-C(4)-H(4C)  | 109.5     |
| H(4A)-C(4)-H(4C) | 109.5     |
| H(4B)-C(4)-H(4C) | 109.5     |
| O(12)-C(5)-O(11) | 126.0(9)  |
| O(12)-C(5)-C(6)  | 119.1(9)  |
| O(11)-C(5)-C(6)  | 114.9(9)  |
| C(5)-O(11)-Hf(5) | 132.4(6)  |
| C(5)-O(12)-Hf(3) | 134.7(7)  |
| C(7)-C(6)-C(8)   | 111.8(10) |
| C(7)-C(6)-C(5)   | 112.9(9)  |
| C(8)-C(6)-C(5)   | 108.6(8)  |
| C(7)-C(6)-H(6A)  | 107.8     |
| C(8)-C(6)-H(6A)  | 107.8     |
| C(5)-C(6)-H(6A)  | 107.8     |
| C(6)-C(7)-H(7A)  | 109.5     |
| C(6)-C(7)-H(7B)  | 109.5     |

|                     |           |
|---------------------|-----------|
| H(7A)-C(7)-H(7B)    | 109.5     |
| C(6)-C(7)-H(7C)     | 109.5     |
| H(7A)-C(7)-H(7C)    | 109.5     |
| H(7B)-C(7)-H(7C)    | 109.5     |
| C(6)-C(8)-H(8A)     | 109.5     |
| C(6)-C(8)-H(8B)     | 109.5     |
| H(8A)-C(8)-H(8B)    | 109.5     |
| C(6)-C(8)-H(8C)     | 109.5     |
| H(8A)-C(8)-H(8C)    | 109.5     |
| H(8B)-C(8)-H(8C)    | 109.5     |
| O(14)-C(9)-O(13)    | 117.5(9)  |
| O(14)-C(9)-C(10)    | 119.9(10) |
| O(13)-C(9)-C(10)    | 122.5(10) |
| O(14)-C(9)-Hf(1)    | 58.7(5)   |
| O(13)-C(9)-Hf(1)    | 59.0(5)   |
| C(10)-C(9)-Hf(1)    | 172.0(9)  |
| C(9)-O(13)-Hf(1)    | 92.4(6)   |
| C(9)-O(14)-Hf(1)    | 92.8(6)   |
| C(11)-C(10)-C(12)   | 113.8(12) |
| C(11)-C(10)-C(9)    | 112.2(11) |
| C(12)-C(10)-C(9)    | 113.2(10) |
| C(11)-C(10)-H(10A)  | 105.6     |
| C(12)-C(10)-H(10A)  | 105.6     |
| C(9)-C(10)-H(10A)   | 105.6     |
| C(10)-C(11)-H(11A)  | 109.5     |
| C(10)-C(11)-H(11B)  | 109.5     |
| H(11A)-C(11)-H(11B) | 109.5     |
| C(10)-C(11)-H(11C)  | 109.5     |
| H(11A)-C(11)-H(11C) | 109.5     |
| H(11B)-C(11)-H(11C) | 109.5     |
| C(10)-C(12)-H(12A)  | 109.5     |
| C(10)-C(12)-H(12B)  | 109.5     |
| H(12A)-C(12)-H(12B) | 109.5     |
| C(10)-C(12)-H(12C)  | 109.5     |
| H(12A)-C(12)-H(12C) | 109.5     |
| H(12B)-C(12)-H(12C) | 109.5     |
| O(15)-C(13)-O(16)   | 115.9(8)  |
| O(15)-C(13)-C(14)   | 124.5(8)  |
| O(16)-C(13)-C(14)   | 119.5(8)  |
| O(15)-C(13)-Hf(4)   | 59.9(5)   |
| O(16)-C(13)-Hf(4)   | 56.7(4)   |
| C(14)-C(13)-Hf(4)   | 169.4(6)  |
| C(13)-O(15)-Hf(4)   | 91.5(5)   |
| C(13)-O(16)-Hf(4)   | 94.7(5)   |
| C(13)-C(14)-C(15)   | 111.9(8)  |
| C(13)-C(14)-C(16)   | 107.9(8)  |
| C(15)-C(14)-C(16)   | 110.9(9)  |
| C(13)-C(14)-H(14A)  | 108.7     |
| C(15)-C(14)-H(14A)  | 108.7     |
| C(16)-C(14)-H(14A)  | 108.7     |
| C(14)-C(15)-H(15A)  | 109.5     |

|                     |          |
|---------------------|----------|
| C(14)-C(15)-H(15B)  | 109.5    |
| H(15A)-C(15)-H(15B) | 109.5    |
| C(14)-C(15)-H(15C)  | 109.5    |
| H(15A)-C(15)-H(15C) | 109.5    |
| H(15B)-C(15)-H(15C) | 109.5    |
| C(14)-C(16)-H(16A)  | 109.5    |
| C(14)-C(16)-H(16B)  | 109.5    |
| H(16A)-C(16)-H(16B) | 109.5    |
| C(14)-C(16)-H(16C)  | 109.5    |
| H(16A)-C(16)-H(16C) | 109.5    |
| H(16B)-C(16)-H(16C) | 109.5    |
| O(18)-C(17)-O(17)   | 124.6(8) |
| O(18)-C(17)-C(18)   | 117.8(8) |
| O(17)-C(17)-C(18)   | 117.5(8) |
| C(17)-O(17)-Hf(4)   | 131.9(6) |
| C(17)-O(18)-Hf(2)   | 135.5(6) |
| C(17)-C(18)-C(19)   | 111.4(8) |
| C(17)-C(18)-C(20)   | 108.1(8) |
| C(19)-C(18)-C(20)   | 110.6(9) |
| C(17)-C(18)-H(18A)  | 108.9    |
| C(19)-C(18)-H(18A)  | 108.9    |
| C(20)-C(18)-H(18A)  | 108.9    |
| C(18)-C(19)-H(19A)  | 109.5    |
| C(18)-C(19)-H(19B)  | 109.5    |
| H(19A)-C(19)-H(19B) | 109.5    |
| C(18)-C(19)-H(19C)  | 109.5    |
| H(19A)-C(19)-H(19C) | 109.5    |
| H(19B)-C(19)-H(19C) | 109.5    |
| C(18)-C(20)-H(20A)  | 109.5    |
| C(18)-C(20)-H(20B)  | 109.5    |
| H(20A)-C(20)-H(20B) | 109.5    |
| C(18)-C(20)-H(20C)  | 109.5    |
| H(20A)-C(20)-H(20C) | 109.5    |
| H(20B)-C(20)-H(20C) | 109.5    |
| O(20)-C(21)-O(19)   | 119.3(9) |
| O(20)-C(21)-C(22)   | 119.9(9) |
| O(19)-C(21)-C(22)   | 120.6(9) |
| O(20)-C(21)-Hf(6)   | 60.1(5)  |
| O(19)-C(21)-Hf(6)   | 59.6(5)  |
| C(22)-C(21)-Hf(6)   | 168.3(7) |
| C(21)-O(19)-Hf(6)   | 91.1(6)  |
| C(21)-O(20)-Hf(6)   | 90.7(6)  |
| C(21)-C(22)-C(24)   | 110.6(9) |
| C(21)-C(22)-C(23)   | 105.7(8) |
| C(24)-C(22)-C(23)   | 113.2(9) |
| C(21)-C(22)-H(22A)  | 109.1    |
| C(24)-C(22)-H(22A)  | 109.1    |
| C(23)-C(22)-H(22A)  | 109.1    |
| C(22)-C(23)-H(23A)  | 109.5    |
| C(22)-C(23)-H(23B)  | 109.5    |
| H(23A)-C(23)-H(23B) | 109.5    |

|                     |           |
|---------------------|-----------|
| C(22)-C(23)-H(23C)  | 109.5     |
| H(23A)-C(23)-H(23C) | 109.5     |
| H(23B)-C(23)-H(23C) | 109.5     |
| C(22)-C(24)-H(24A)  | 109.5     |
| C(22)-C(24)-H(24B)  | 109.5     |
| H(24A)-C(24)-H(24B) | 109.5     |
| C(22)-C(24)-H(24C)  | 109.5     |
| H(24A)-C(24)-H(24C) | 109.5     |
| H(24B)-C(24)-H(24C) | 109.5     |
| O(21)-C(25)-O(22)   | 125.4(9)  |
| O(21)-C(25)-C(26)   | 117.8(9)  |
| O(22)-C(25)-C(26)   | 116.8(9)  |
| C(25)-O(21)-Hf(5)   | 132.9(6)  |
| C(25)-O(22)-Hf(6)   | 133.6(6)  |
| C(27)-C(26)-C(25)   | 112.2(9)  |
| C(27)-C(26)-C(28)   | 112.0(10) |
| C(25)-C(26)-C(28)   | 106.6(9)  |
| C(27)-C(26)-H(26A)  | 108.6     |
| C(25)-C(26)-H(26A)  | 108.6     |
| C(28)-C(26)-H(26A)  | 108.6     |
| C(26)-C(27)-H(27A)  | 109.5     |
| C(26)-C(27)-H(27B)  | 109.5     |
| H(27A)-C(27)-H(27B) | 109.5     |
| C(26)-C(27)-H(27C)  | 109.5     |
| H(27A)-C(27)-H(27C) | 109.5     |
| H(27B)-C(27)-H(27C) | 109.5     |
| C(26)-C(28)-H(28A)  | 109.5     |
| C(26)-C(28)-H(28B)  | 109.5     |
| H(28A)-C(28)-H(28B) | 109.5     |
| C(26)-C(28)-H(28C)  | 109.5     |
| H(28A)-C(28)-H(28C) | 109.5     |
| H(28B)-C(28)-H(28C) | 109.5     |
| O(23)-C(29)-O(24)   | 124.5(8)  |
| O(23)-C(29)-C(30)   | 116.1(8)  |
| O(24)-C(29)-C(30)   | 119.4(8)  |
| C(29)-O(23)-Hf(5)   | 135.0(6)  |
| C(29)-O(24)-Hf(2)   | 133.7(6)  |
| C(29)-C(30)-C(31)   | 108.9(9)  |
| C(29)-C(30)-C(32)   | 112.8(8)  |
| C(31)-C(30)-C(32)   | 111.9(9)  |
| C(29)-C(30)-H(30A)  | 107.7     |
| C(31)-C(30)-H(30A)  | 107.7     |
| C(32)-C(30)-H(30A)  | 107.7     |
| C(30)-C(31)-H(31A)  | 109.5     |
| C(30)-C(31)-H(31B)  | 109.5     |
| H(31A)-C(31)-H(31B) | 109.5     |
| C(30)-C(31)-H(31C)  | 109.5     |
| H(31A)-C(31)-H(31C) | 109.5     |
| H(31B)-C(31)-H(31C) | 109.5     |
| C(30)-C(32)-H(32A)  | 109.5     |
| C(30)-C(32)-H(32B)  | 109.5     |

|                     |           |
|---------------------|-----------|
| H(32A)-C(32)-H(32B) | 109.5     |
| C(30)-C(32)-H(32C)  | 109.5     |
| H(32A)-C(32)-H(32C) | 109.5     |
| H(32B)-C(32)-H(32C) | 109.5     |
| O(25)-C(33)-O(26)   | 125.4(10) |
| O(25)-C(33)-C(34)   | 117.3(8)  |
| O(26)-C(33)-C(34)   | 117.3(9)  |
| C(33)-O(25)-Hf(3)   | 135.8(6)  |
| C(33)-O(26)-Hf(4)   | 131.2(6)  |
| C(36)-C(34)-C(33)   | 110.4(8)  |
| C(36)-C(34)-C(35)   | 110.9(9)  |
| C(33)-C(34)-C(35)   | 107.8(9)  |
| C(36)-C(34)-H(34A)  | 109.3     |
| C(33)-C(34)-H(34A)  | 109.3     |
| C(35)-C(34)-H(34A)  | 109.3     |
| C(34)-C(35)-H(35A)  | 109.5     |
| C(34)-C(35)-H(35B)  | 109.5     |
| H(35A)-C(35)-H(35B) | 109.5     |
| C(34)-C(35)-H(35C)  | 109.5     |
| H(35A)-C(35)-H(35C) | 109.5     |
| H(35B)-C(35)-H(35C) | 109.5     |
| C(34)-C(36)-H(36A)  | 109.5     |
| C(34)-C(36)-H(36B)  | 109.5     |
| H(36A)-C(36)-H(36B) | 109.5     |
| C(34)-C(36)-H(36C)  | 109.5     |
| H(36A)-C(36)-H(36C) | 109.5     |
| H(36B)-C(36)-H(36C) | 109.5     |
| O(27)-C(37)-O(28)   | 123.7(9)  |
| O(27)-C(37)-C(38)   | 124.8(9)  |
| O(28)-C(37)-C(38)   | 111.5(9)  |
| C(37)-O(28)-H(28)   | 109.5     |
| C(37)-C(38)-C(39)   | 110.1(9)  |
| C(37)-C(38)-C(40)   | 109.5(9)  |
| C(39)-C(38)-C(40)   | 111.0(10) |
| C(37)-C(38)-H(38A)  | 108.7     |
| C(39)-C(38)-H(38A)  | 108.7     |
| C(40)-C(38)-H(38A)  | 108.7     |
| C(38)-C(39)-H(39A)  | 109.5     |
| C(38)-C(39)-H(39B)  | 109.5     |
| H(39A)-C(39)-H(39B) | 109.5     |
| C(38)-C(39)-H(39C)  | 109.5     |
| H(39A)-C(39)-H(39C) | 109.5     |
| H(39B)-C(39)-H(39C) | 109.5     |
| C(38)-C(40)-H(40A)  | 109.5     |
| C(38)-C(40)-H(40B)  | 109.5     |
| H(40A)-C(40)-H(40B) | 109.5     |
| C(38)-C(40)-H(40C)  | 109.5     |
| H(40A)-C(40)-H(40C) | 109.5     |
| H(40B)-C(40)-H(40C) | 109.5     |
| O(42)-C(41)-O(29)   | 123.5(9)  |
| O(42)-C(41)-C(43)   | 119.1(8)  |

|                     |           |
|---------------------|-----------|
| O(29)-C(41)-C(43)   | 117.3(9)  |
| C(41)-O(29)-Hf(3)   | 144.4(6)  |
| C(41)-C(43)-C(45)   | 110.4(8)  |
| C(41)-C(43)-C(44)   | 112.4(8)  |
| C(45)-C(43)-C(44)   | 110.2(9)  |
| C(41)-C(43)-H(43A)  | 107.9     |
| C(45)-C(43)-H(43A)  | 107.9     |
| C(44)-C(43)-H(43A)  | 107.9     |
| C(43)-C(44)-H(44A)  | 109.5     |
| C(43)-C(44)-H(44B)  | 109.5     |
| H(44A)-C(44)-H(44B) | 109.5     |
| C(43)-C(44)-H(44C)  | 109.5     |
| H(44A)-C(44)-H(44C) | 109.5     |
| H(44B)-C(44)-H(44C) | 109.5     |
| C(43)-C(45)-H(45A)  | 109.5     |
| C(43)-C(45)-H(45B)  | 109.5     |
| H(45A)-C(45)-H(45B) | 109.5     |
| C(43)-C(45)-H(45C)  | 109.5     |
| H(45A)-C(45)-H(45C) | 109.5     |
| H(45B)-C(45)-H(45C) | 109.5     |
| O(30)-C(46)-O(31)   | 123.3(10) |
| O(30)-C(46)-C(47)   | 124.4(11) |
| O(31)-C(46)-C(47)   | 112.3(11) |
| C(46)-C(47)-C(48)   | 112.5(11) |
| C(46)-C(47)-C(49)   | 110.4(11) |
| C(48)-C(47)-C(49)   | 111.6(12) |
| C(46)-C(47)-H(47A)  | 107.3     |
| C(48)-C(47)-H(47A)  | 107.3     |
| C(49)-C(47)-H(47A)  | 107.3     |
| C(46)-O(31)-H(31)   | 109.5     |
| C(47)-C(48)-H(48A)  | 109.5     |
| C(47)-C(48)-H(48B)  | 109.5     |
| H(48A)-C(48)-H(48B) | 109.5     |
| C(47)-C(48)-H(48C)  | 109.5     |
| H(48A)-C(48)-H(48C) | 109.5     |
| H(48B)-C(48)-H(48C) | 109.5     |
| C(47)-C(49)-H(49A)  | 109.5     |
| C(47)-C(49)-H(49B)  | 109.5     |
| H(49A)-C(49)-H(49B) | 109.5     |
| C(47)-C(49)-H(49C)  | 109.5     |
| H(49A)-C(49)-H(49C) | 109.5     |
| H(49B)-C(49)-H(49C) | 109.5     |
| O(32)-C(50)-O(33)   | 124.7(10) |
| O(32)-C(50)-C(51)   | 122.7(11) |
| O(33)-C(50)-C(51)   | 112.6(10) |
| C(50)-O(32)-H(32)   | 109.5     |
| C(50)-O(33)-H(33)   | 109.5     |
| C(53)-C(51)-C(52)   | 115.7(13) |
| C(53)-C(51)-C(50)   | 112.4(12) |
| C(52)-C(51)-C(50)   | 112.8(11) |
| C(53)-C(51)-H(51A)  | 104.9     |

|                     |           |
|---------------------|-----------|
| C(52)-C(51)-H(51A)  | 104.9     |
| C(50)-C(51)-H(51A)  | 104.9     |
| C(51)-C(52)-H(52A)  | 109.5     |
| C(51)-C(52)-H(52B)  | 109.5     |
| H(52A)-C(52)-H(52B) | 109.5     |
| C(51)-C(52)-H(52C)  | 109.5     |
| H(52A)-C(52)-H(52C) | 109.5     |
| H(52B)-C(52)-H(52C) | 109.5     |
| C(51)-C(53)-H(53A)  | 109.5     |
| C(51)-C(53)-H(53B)  | 109.5     |
| H(53A)-C(53)-H(53B) | 109.5     |
| C(51)-C(53)-H(53C)  | 109.5     |
| H(53A)-C(53)-H(53C) | 109.5     |
| H(53B)-C(53)-H(53C) | 109.5     |
| O(35)-C(54)-O(34)   | 124.3(9)  |
| O(35)-C(54)-C(55)   | 119.6(9)  |
| O(34)-C(54)-C(55)   | 116.1(8)  |
| C(54)-O(34)-Hf(2)   | 134.3(6)  |
| C(54)-O(35)-Hf(1)   | 134.4(7)  |
| C(54)-C(55)-C(57)   | 111.4(9)  |
| C(54)-C(55)-C(56)   | 112.5(8)  |
| C(57)-C(55)-C(56)   | 111.1(10) |
| C(54)-C(55)-H(55A)  | 107.2     |
| C(57)-C(55)-H(55A)  | 107.2     |
| C(56)-C(55)-H(55A)  | 107.2     |
| C(55)-C(56)-H(56A)  | 109.5     |
| C(55)-C(56)-H(56B)  | 109.5     |
| H(56A)-C(56)-H(56B) | 109.5     |
| C(55)-C(56)-H(56C)  | 109.5     |
| H(56A)-C(56)-H(56C) | 109.5     |
| H(56B)-C(56)-H(56C) | 109.5     |
| C(55)-C(57)-H(57A)  | 109.5     |
| C(55)-C(57)-H(57B)  | 109.5     |
| H(57A)-C(57)-H(57B) | 109.5     |
| C(55)-C(57)-H(57C)  | 109.5     |
| H(57A)-C(57)-H(57C) | 109.5     |
| H(57B)-C(57)-H(57C) | 109.5     |
| O(37)-C(58)-O(36)   | 125.5(9)  |
| O(37)-C(58)-C(59)   | 116.9(8)  |
| O(36)-C(58)-C(59)   | 117.6(9)  |
| C(60)-C(59)-C(61)   | 111.5(9)  |
| C(60)-C(59)-C(58)   | 108.3(9)  |
| C(61)-C(59)-C(58)   | 113.3(8)  |
| C(60)-C(59)-H(59A)  | 107.9     |
| C(61)-C(59)-H(59A)  | 107.9     |
| C(58)-C(59)-H(59A)  | 107.9     |
| C(58)-O(36)-Hf(3)   | 134.0(6)  |
| C(58)-O(37)-Hf(6)   | 133.5(6)  |
| Hf(2)-O(38)-H(38C)  | 135(5)    |
| Hf(2)-O(38)-H(38D)  | 126(5)    |
| H(38C)-O(38)-H(38D) | 99(2)     |

|                     |       |
|---------------------|-------|
| C(59)-C(60)-H(60A)  | 109.5 |
| C(59)-C(60)-H(60B)  | 109.5 |
| H(60A)-C(60)-H(60B) | 109.5 |
| C(59)-C(60)-H(60C)  | 109.5 |
| H(60A)-C(60)-H(60C) | 109.5 |
| H(60B)-C(60)-H(60C) | 109.5 |
| C(59)-C(61)-H(61A)  | 109.5 |
| C(59)-C(61)-H(61B)  | 109.5 |
| H(61A)-C(61)-H(61B) | 109.5 |
| C(59)-C(61)-H(61C)  | 109.5 |
| H(61A)-C(61)-H(61C) | 109.5 |
| H(61B)-C(61)-H(61C) | 109.5 |
